# Supplementary material
Source: Research Square preprint supplement (doi:10.21203/rs.3.rs-9015987/v1)
Supplement: Supplementary file 1 [file 5df9899b19c7be826c02db51.docx]

**Table S1.** Molecular docking information.

| CurPocket | Vina score | Cavity volume (Å3) | Center(x, y, z) | Docking size(x, y, z) |
| --- | --- | --- | --- | --- |
| CDK2 | -8.1 | 1187 | -1, -10, 14 | 23, 23, 33 |
| MET | -8.3 | 1183 | 60, 21, 83 | 23, 23, 31 |
| PLAU | -6.7 | 195 | 29, 6, 30 | 23, 23, 23 |
